# Supplementary material
Source: HighWire-hosted journal article supplement (https://bmjopenquality.bmj.com/content/11/4/e002024)
Supplement: inline-supplementary-material-8 [file inline-supplementary-material-8.pdf]

**Appendix 8. Before and after results of enrolled hospitals in safety culture surveyed through three domains: communication openness, non-punitive response to error, and staffing.**

| staffing.  | Communication Openness |                   | Non-Punitive Response to Errors |                   | Staffing   |                   |
|------------|------------------------|-------------------|---------------------------------|-------------------|------------|-------------------|
|            | Baseline               | Post-Intervention | Baseline                        | Post-Intervention | Baseline   | Post-Intervention |
| Hospital B | 42%                    | 41.6%             | 7%                              | 18.3%             | 6%         | 20.3%             |
| Hospital A | Low Sample             | 37.7%             | Low Sample                      | 14.0%             | Low Sample | 17.7%             |
| Hospital D | 57%                    | 44.0%             | 22%                             | 14.8%             | 19%        | 14.3%             |
| Hospital C | 33%                    | 35.3%             | 26%                             | 16.8%             | 30%        | 12.3%             |
| Hospital E | 51%                    | 79.3%             | 26%                             | 11.8%             | 33%        | 11.8%             |
